# Supplementary material for: Reference-Free Comparative Genomics of 174 Chloroplasts
Source: PLoS One. 2012 Nov 20;7(11):e48995. doi: 10.1371/journal.pone.0048995 (PMC3502452; doi:10.1371/journal.pone.0048995)
Supplement: Table S1 — This XLS-format spreadsheet file provides the relevant reference information about the 174 chloroplast genomes analyzed in this study, including NCBI accession numbers and basic genomic properties. (XLS) [file pone.0048995.s003.xls]

## Sheet: 174genomes
Family	Species	genome size (bp)	kmer diversity(#)	2 copies of IR	NCBI Accession
Poaceae	Acidosasa_purpurea	139668	117738	yes	>gi340034177
Acoraceae	Acorus_americanus	153819	127521	yes	>gi161622288
Acoraceae	Acorus_calamus	153821	127533	yes	>gi75755638
Pteridaceae	Adiantum_capillusveneris	150568	127074	yes	>gi30352011
Brassicaceae	Aethionema_cordifolium	154168	127514	yes	>gi139390328
Brassicaceae	Aethionema_grandiflorum	154243	127605	yes	>gi139389244
Asteraceae	Ageratina_adenophora	150698	125697	yes	>gi334701780
Poaceae	Agrostis_stolonifera	136584	114712	yes	>gi118430280
Cyatheaceae	Alsophila_spinulosa	156661	131843	yes	>gi242910132
Amborellaceae	Amborella_trichopoda	162686	135982	yes	>gi34500893
Aneuraceae	Aneura_mirabilis	108007	99775	yes	>gi169142775
Marattiaceae	Angiopteris_evecta	153901	130890	yes	>gi124302880
Poaceae	Anomochloa_marantoidea	138412	116001	yes	>gi295065706
Apiaceae	Anthriscus_cerefolium	154719	128426	yes	>gi323149061
Brassicaceae	Arabidopsis_thaliana	154478	128164	yes	>gi7525012
Brassicaceae	Arabis_hirsuta	153689	127211	yes	>gi139389622
Solanaceae	Atropa_belladonna	156687	130771	yes	>gi28261696
Poaceae	Bambusa_emeiensis	139458	117543	yes	>gi340034430
Poaceae	Bambusa_oldhamii	139350	117439	yes	>gi253729536
Brassicaceae	Barbarea_verna	154532	127942	yes	>gi139388073
Poaceae	Brachypodium_distachyon	135199	113740	yes	>gi194033128
Brassicaceae	Brassica_rapa	153482	127193	yes	>gi323481965
Bryopsidaceae	Bryopsis_hypnoides	153429	145279	yes	>gi260780633
Buxaceae	Buxus_microphylla	159010	132396	yes	>gi149390519
Calycanthaceae	Calycanthus_floridus	153337	129976	yes	>gi32480822
Brassicaceae	Capsella_bursapastoris	154490	127874	yes	>gi139387231
Caricaceae	Carica_papaya	160100	133677	yes	>gi167391784
Fagaceae	Castanea_molissima	160799	135023	yes	>gi309321499
Pinaceae	Cathaya_argyrophylla	107122	105430	no	>gi309322360
Pinaceae	Cedrus_deodara	119299	117225	no	>gi309322284
Cephalotaxaceae	Cephalotaxus_wilsoniana	136168	134518	no	>gi352950958
Ceratophyllaceae	Ceratophyllum_demersum	156252	130838	yes	>gi159161139
Chlamydomonadaceae	Chlamydomonas_reinhardtii	203828	169422	yes	>gi41179002
Chloranthaceae	Chloranthus_spicatus	157772	131543	yes	>gi149390247
Fabaceae	Cicer_arietinum	125319	124786	no	>gi197294093
Rutaceae	Citrus_sinensis	160129	133035	yes	>gi114329635
Rubiaceae	Coffea_arabica	155189	129123	yes	>gi116617087
Poaceae	Coix_lacrymajobi	140745	117849	yes	>gi260677373
Corynocarpaceae	Corynocarpus_laevigata	159202	133417	yes	>gi317046152
Apiaceae	Crithmum_maritimum	158358	130199	yes	>gi340033917
Brassicaceae	Crucihimalaya_wallichii	155199	128662	yes	>gi139389780
Cupressaceae	Cryptomeria_japonica	131810	130708	no	>gi172072868
Cucurbitaceae	Cucumis_melo	156017	130141	yes	>gi346578170
Cucurbitaceae	Cucumis_sativus	155293	130529	yes	>gi68164782
Convolvulaceae	Cuscuta_exaltata	125373	108578	yes	>gi159161233
Convolvulaceae	Cuscuta_gronovii	86744	72409	yes	>gi156618891
Convolvulaceae	Cuscuta_obtusiflora	85286	71166	yes	>gi159106781
Convolvulaceae	Cuscuta_reflexa	121521	104618	yes	>gi156618806
Cycadaceae	Cycas_taitungensis	163403	137993	yes	>gi150251435
Apiaceae	Daucus_carota	155911	128782	yes	>gi114107112
Poaceae	Dendrocalamus_latiflorus	139394	117534	yes	>gi255961360
Dioscoreaceae	Dioscorea_elephantipes	152609	127031	yes	>gi149390334
Brassicaceae	Draba_nemorosa	153289	126804	yes	>gi139389930
Winteraceae	Drimys_granadensis	160604	133817	yes	>gi115604913
Ephedraceae	Ephedra_equisetina	109518	88830	yes	>gi222139869
Orobanchaceae	Epifagus_virginiana	70028	47305	yes	>gi11466954
Equisetaceae	Equisetum_arvense	133309	122322	yes	>gi313183887
Geraniaceae	Erodium_carvifolium	116935	115609	no	>gi323148809
Geraniaceae	Erodium_texanum	130812	123016	no	>gi309322050
Myrtaceae	Eucalyptus_globulus	160286	133568	yes	>gi108802622
Myrtaceae	Eucalyptus_grandis	160108	133704	yes	>gi309322431
Polygonaceae	Fagopyrum_esculentum	159599	128775	yes	>gi189162250
Poaceae	Ferrocalamus_rimosivaginus	139458	117491	yes	>gi340034515
Poaceae	Festuca_arundinacea	136048	114417	yes	>gi255961284
Rosaceae	Fragaria_vesca	155691	129589	yes	>gi325126844
Geraniaceae	Geranium_palmatum	155794	136694	yes	>gi309322129
Fabaceae	Glycine_max	152218	126218	yes	>gi91214122
Gnetaceae	Gnetum_parvifolium	114914	95266	yes	>gi222084134
Malvaceae	Gossypium_barbadense	160317	134565	yes	>gi119368478
Malvaceae	Gossypium_hirsutum	160301	134514	yes	>gi91208881
Malvaceae	Gossypium_thurberi	160264	134459	yes	>gi325210909
Asteraceae	Guizotia_abyssinica	151762	126842	yes	>gi183217719
Asteraceae	Helianthus_annuus	151104	126306	yes	>gi94502469
Euphorbiaceae	Hevea_brasiliensis	161191	134023	yes	>gi326909372
Poaceae	Hordeum_vulgare	136462	114691	yes	>gi118430366
Lycopodiaceae	Huperzia_lucidula	154373	138342	yes	>gi60117151
Schisandraceae	Illicium_oligandrum	148553	133337	yes	>gi149390421
Poaceae	Indocalamus_longiauritus	139668	117706	yes	>gi339906432
Convolvulaceae	Ipomoea_purpurea	162046	130407	yes	>gi157325509
Isoetaceae	Isoetes_flaccida	145303	131863	yes	>gi313199596
Oleaceae	Jasminum_nudiflorum	165121	132799	yes	>gi115391881
Euphorbiaceae	Jatropha_curcas	163856	136409	yes	>gi225544104
Pinaceae	Keteleeria_davidiana	117720	115810	no	>gi222084058
Asteraceae	Lactuca_sativa	152765	127548	yes	>gi81176229
Fabaceae	Lathyrus_sativus	121020	120524	no	>gi295136900
Araceae	Lemna_minor	165955	134631	yes	>gi161784171
Brassicaceae	Lepidium_virginicum	154743	128258	yes	>gi139388889
Magnoliaceae	Liriodendron_tulipifera	159886	133431	yes	>gi114107025
Brassicaceae	Lobularia_maritima	152659	126265	yes	>gi139390132
Poaceae	Lolium_perenne	135282	113767	yes	>gi159106843
Fabaceae	Lotus_japonicus	150519	125015	yes	>gi13518417
Magnoliaceae	Magnolia_kwangsiensis	159618	133098	yes	>gi342316184
Euphorbiaceae	Manihot_esculenta	161453	134161	yes	>gi169794052
Marchantiaceae	Marchantia_polymorpha	121024	110748	yes	>gi11466673
Fabaceae	Medicago_truncatula	124033	122992	no	>gi17570783
Ranunculaceae	Megaleranthis_saniculifolia	159924	133211	yes	>gi229577732
Geraniaceae	Monsonia_speciosa	128787	120599	yes	>gi309322207
Moraceae	Morus_indica	158484	132742	yes	>gi114804244
Berberidaceae	Nandina_domestica	156599	130483	yes	>gi114329947
Brassicaceae	Nasturtium_officinale	155105	128515	yes	>gi139389075
Nelumbonaceae	Nelumbo_lutea	163206	137040	yes	>gi334361928
Nelumbonaceae	Nelumbo_nucifera	163307	137075	yes	>gi334362028
Solanaceae	Nicotiana_sylvestris	155941	130551	yes	>gi78102509
Solanaceae	Nicotiana_tabacum	155943	130556	yes	>gi81238323
Solanaceae	Nicotiana_tomentosiformis	155745	130264	yes	>gi81301540
Nymphaeaceae	Nuphar_advena	160866	134834	yes	>gi121720592
Nymphaeaceae	Nymphaea_alba	159930	134630	yes	>gi50346761
Onagraceae	Oenothera_argillicola	165055	134330	yes	>gi169142689
Onagraceae	Oenothera_biennis	164807	134870	yes	>gi169142924
Onagraceae	Oenothera_elata	165728	134877	yes	>gi164597805
Onagraceae	Oenothera_glazioviana	165225	134784	yes	>gi169142839
Onagraceae	Oenothera_parviflora	163365	134004	yes	>gi169143010
Oleaceae	Olea_europaea	155872	130202	yes	>gi283794947
Oleaceae	Olea_woodiana	155908	130135	yes	>gi334701598
Orchidaceae	Oncidium_Gower	146484	120716	yes	>gi295311711
Poaceae	Oryza_Indica	134496	113597	yes	>gi109156581
Poaceae	Oryza_Japonica	134525	113614	yes	>gi11466763
Poaceae	Oryza_nivara	134494	113586	yes	>gi50233947
Apiaceae	Oxypolis_greenmanii	154718	128109	yes	>gi340034600
Araliaceae	Panax_ginseng	156318	129893	yes	>gi52220789
Poaceae	Panicum_virgatum	139598	116795	yes	>gi345895196
Asteraceae	Parthenium_argentatum	152803	127636	yes	>gi281190713
Geraniaceae	Pelargonium_x	217942	136016	yes	>gi115531893
Apiaceae	Petroselinum_crispum	152890	128144	yes	>gi340034260
Orchidaceae	Phalaenopsis_aphrodite	148964	123224	yes	>gi78103230
Fabaceae	Phaseolus_vulgaris	150285	123534	yes	>gi139387430
Arecaceae	Phoenix_dactylifera	158455	131026	yes	>gi292559490
Poaceae	Phyllostachys_edulis	139668	117777	yes	>gi340034006
Poaceae	Phyllostachys_nigra	139808	117790	yes	>gi340034345
Funariaceae	Physcomitrella_patens	122890	113126	yes	>gi34501376
Pinaceae	Picea_morrisonicola	124128	121581	no	>gi353351805
Pinaceae	Picea_sitchensis	120176	108946	no	>gi237688442
Pinaceae	Pinus_contorta	120011	110706	no	>gi237688507
Pinaceae	Pinus_gerardiana	117618	112358	no	>gi324986332
Pinaceae	Pinus_koraiensis	117190	115696	no	>gi145408420
Pinaceae	Pinus_krempfii	116598	110445	no	>gi237688643
Pinaceae	Pinus_longaeva	117726	111082	no	>gi237598369
Pinaceae	Pinus_monophylla	116479	109535	no	>gi324986413
Pinaceae	Pinus_nelsonii	116834	109584	no	>gi324986484
Pinaceae	Pinus_thunbergii	119707	117428	no	>gi7524593
Piperaceae	Piper_cenocladum	160624	132958	yes	>gi115605001
Fabaceae	Pisum_sativum	122169	121827	no	>gi295136975
Platanaceae	Platanus_occidentalis	161791	136620	yes	>gi114329725
Salicaceae	Populus_alba	156505	128715	yes	>gi110227059
Salicaceae	Populus_trichocarpa	157033	129262	yes	>gi134093177
Rosaceae	Prunus_persica	157790	131304	yes	>gi313183801
Pinaceae	Pseudotsuga_sinensis	122518	119493	no	>gi351653779
Psilotaceae	Psilotum_nudum	138829	119717	yes	>gi18860289
Dennstaedtiaceae	Pteridium_aquilinum	152362	128935	yes	>gi301353331
Ptilidiaceae	Ptilidium_pulcherrimum	119007	110133	yes	>gi330850604
Rosaceae	Pyrus_pyrifolia	159898	133322	yes	>gi346683273
Ranunculaceae	Ranunculus_macranthus	155129	129216	yes	>gi122893969
Orchidaceae	Rhizanthella_gardneri	59190	49422	yes	>gi317134108
Poaceae	Saccharum_officinarum	141182	118074	yes	>gi50812505
Selaginellaceae	Selaginella_moellendorffii	143780	131022	yes	>gi255961289
Solanaceae	Solanum_bulbocastanum	155371	129649	yes	>gi91208967
Solanaceae	Solanum_lycopersicum	155461	129708	yes	>gi149384932
Solanaceae	Solanum_tuberosum	155296	129546	yes	>gi294768541
Poaceae	Sorghum_bicolor	140754	117684	yes	>gi118614470
Amaranthaceae	Spinacia_oleracea	150725	125575	yes	>gi11497503
Araceae	Spirodela_polyrhiza	168788	136879	yes	>gi342316100
Pottiaceae	Syntrichia_ruralis	122630	111571	yes	>gi223931033
Cupressaceae	Taiwania_cryptomerioides	132598	130302	no	>gi352951041
Malvaceae	Theobroma_cacao	160546	134781	yes	>gi313199681
Campanulaceae	Trachelium_caeruleum	162321	130265	yes	>gi170784721
Fabaceae	Trifolium_subterraneum	144763	134104	no	>gi219673952
Poaceae	Triticum_aestivum	134545	113649	yes	>gi14017551
Typhaceae	Typha_latifolia	161572	134554	yes	>gi289065068
Fabaceae	Vigna_radiata	151271	124368	yes	>gi289066804
Vitaceae	Vitis_vinifera	160928	134489	yes	>gi91983971
Welwitschiaceae	Welwitschia_mirabilis	119726	99040	yes	>gi187763084
Araceae	Wolffia_australiana	168704	136284	yes	>gi342316353
Araceae	Wolffiella_lingulata	169337	137522	yes	>gi342316269
Poaceae	Zea_mays	140384	117390	yes	>gi11994090

## Sheet: taxonomy
Acidosasa_purpurea	Eukaryota	Viridiplantae	Streptophyta	Embryophyta	Tracheophyta	Spermatophyta	Magnoliophyta	Liliopsida	Poales	Poaceae	BEP_clade	Bambusoideae	Bambuseae	Acidosasa
Acorus_americanus	Eukaryota	Viridiplantae	Streptophyta	Embryophyta	Tracheophyta	Spermatophyta	Magnoliophyta	Liliopsida	Acoraceae	Acorus
Acorus_calamus	Eukaryota	Viridiplantae	Streptophyta	Embryophyta	Tracheophyta	Spermatophyta	Magnoliophyta	Liliopsida	Acoraceae	Acorus
Adiantum_capillusveneris	Eukaryota	Viridiplantae	Streptophyta	Embryophyta	Tracheophyta	Moniliformopses	Polypodiopsida	Polypodiales	Pteridaceae	Adiantum
Aethionema_cordifolium	Eukaryota	Viridiplantae	Streptophyta	Embryophyta	Tracheophyta	Spermatophyta	Magnoliophyta	eudicotyledons	coreeudicotyledons	rosids	malvids	Brassicales	Brassicaceae	Aethionemeae	Aethionema
Aethionema_grandiflorum	Eukaryota	Viridiplantae	Streptophyta	Embryophyta	Tracheophyta	Spermatophyta	Magnoliophyta	eudicotyledons	coreeudicotyledons	rosids	malvids	Brassicales	Brassicaceae	Aethionemeae	Aethionema
Ageratina_adenophora	Eukaryota	Viridiplantae	Streptophyta	Embryophyta	Tracheophyta	Spermatophyta	Magnoliophyta	eudicotyledons	coreeudicotyledons	asterids	campanulids	Asterales	Asteraceae	Asteroideae	Heliantheaealliance	Eupatorieae	Ageratina
Agrostis_stolonifera	Eukaryota	Viridiplantae	Streptophyta	Embryophyta	Tracheophyta	Spermatophyta	Magnoliophyta	Liliopsida	Poales	Poaceae	BEP_clade	Pooideae	Poeae	Agrostidinae	Agrostis
Alsophila_spinulosa	Eukaryota	Viridiplantae	Streptophyta	Embryophyta	Tracheophyta	Moniliformopses	Polypodiopsida	Cyatheales	Cyatheaceae	Alsophila
Amborella_trichopoda	Eukaryota	Viridiplantae	Streptophyta	Embryophyta	Tracheophyta	Spermatophyta	Magnoliophyta	basalMagnoliophyta	Amborellales	Amborellaceae	Amborella
Aneura_mirabilis	Eukaryota	Viridiplantae	Streptophyta	Embryophyta	Marchantiophyta	Jungermanniopsida	Metzgeriidae	Metzgeriales	Aneuraceae	Aneura
Angiopteris_evecta	Eukaryota	Viridiplantae	Streptophyta	Embryophyta	Tracheophyta	Moniliformopses	Marattiopsida	Marattiales	Marattiaceae	Angiopteris
Anomochloa_marantoidea	Eukaryota	Viridiplantae	Streptophyta	Embryophyta	Tracheophyta	Spermatophyta	Magnoliophyta	Liliopsida	Poales	Poaceae	Anomochlooideae	Anomochloeae	Anomochloa
Anthriscus_cerefolium	Eukaryota	Viridiplantae	Streptophyta	Embryophyta	Tracheophyta	Spermatophyta	Magnoliophyta	eudicotyledons	coreeudicotyledons	asterids	campanulids	Apiales	Apiaceae	Apioideae	Scandiceae	Scandicinae	Anthriscus
Arabidopsis_thaliana	Eukaryota	Viridiplantae	Streptophyta	Embryophyta	Tracheophyta	Spermatophyta	Magnoliophyta	eudicotyledons	coreeudicotyledons	rosids	malvids	Brassicales	Brassicaceae	Camelineae	Arabidopsis
Arabis_hirsuta	Eukaryota	Viridiplantae	Streptophyta	Embryophyta	Tracheophyta	Spermatophyta	Magnoliophyta	eudicotyledons	coreeudicotyledons	rosids	malvids	Brassicales	Brassicaceae	Arabideae	Arabis
Atropa_belladonna	Eukaryota	Viridiplantae	Streptophyta	Embryophyta	Tracheophyta	Spermatophyta	Magnoliophyta	eudicotyledons	coreeudicotyledons	asterids	lamiids	Solanales	Solanaceae	Solanoideae	Hyoscyameae	Atropa
Bambusa_emeiensis	Eukaryota	Viridiplantae	Streptophyta	Embryophyta	Tracheophyta	Spermatophyta	Magnoliophyta	Liliopsida	Poales	Poaceae	BEP_clade	Bambusoideae	Bambuseae	Bambusa
Bambusa_oldhamii	Eukaryota	Viridiplantae	Streptophyta	Embryophyta	Tracheophyta	Spermatophyta	Magnoliophyta	Liliopsida	Poales	Poaceae	BEP_clade	Bambusoideae	Bambuseae	Bambusa
Barbarea_verna	Eukaryota	Viridiplantae	Streptophyta	Embryophyta	Tracheophyta	Spermatophyta	Magnoliophyta	eudicotyledons	coreeudicotyledons	rosids	malvids	Brassicales	Brassicaceae	Cardamineae	Barbarea
Brachypodium_distachyon	Eukaryota	Viridiplantae	Streptophyta	Embryophyta	Tracheophyta	Spermatophyta	Magnoliophyta	Liliopsida	Poales	Poaceae	BEP_clade	Pooideae	Brachypodieae	Brachypodium
Brassica_rapa	Eukaryota	Viridiplantae	Streptophyta	Embryophyta	Tracheophyta	Spermatophyta	Magnoliophyta	eudicotyledons	coreeudicotyledons	rosids	malvids	Brassicales	Brassicaceae	Brassiceae	Brassica
Bryopsis_hypnoides	Eukaryota	Viridiplantae	Chlorophyta	Ulvophyceae	Bryopsidales	Bryopsidaceae	Bryopsis
Buxus_microphylla	Eukaryota	Viridiplantae	Streptophyta	Embryophyta	Tracheophyta	Spermatophyta	Magnoliophyta	eudicotyledons	Buxales	Buxaceae	Buxus
Calycanthus_floridus	Eukaryota	Viridiplantae	Streptophyta	Embryophyta	Tracheophyta	Spermatophyta	Magnoliophyta	magnoliids	Laurales	Calycanthaceae	Calycanthus
Capsella_bursapastoris	Eukaryota	Viridiplantae	Streptophyta	Embryophyta	Tracheophyta	Spermatophyta	Magnoliophyta	eudicotyledons	coreeudicotyledons	rosids	malvids	Brassicales	Brassicaceae	Camelineae	Capsella
Carica_papaya	Eukaryota	Viridiplantae	Streptophyta	Embryophyta	Tracheophyta	Spermatophyta	Magnoliophyta	eudicotyledons	coreeudicotyledons	rosids	malvids	Brassicales	Caricaceae	Carica
Castanea_molissima	Eukaryota	Viridiplantae	Streptophyta	Embryophyta	Tracheophyta	Spermatophyta	Magnoliophyta	eudicotyledons	coreeudicotyledons	rosids	fabids	Fagales	Fagaceae	Castanea
Cathaya_argyrophylla	Eukaryota	Viridiplantae	Streptophyta	Embryophyta	Tracheophyta	Spermatophyta	Coniferopsida	Coniferales	Pinaceae	Cathaya
Cedrus_deodara	Eukaryota	Viridiplantae	Streptophyta	Embryophyta	Tracheophyta	Spermatophyta	Coniferopsida	Coniferales	Pinaceae	Cedrus
Cephalotaxus_wilsoniana	Eukaryota	Viridiplantae	Streptophyta	Embryophyta	Tracheophyta	Spermatophyta	Coniferopsida	Coniferales	Cephalotaxaceae	Cephalotaxus
Ceratophyllum_demersum	Eukaryota	Viridiplantae	Streptophyta	Embryophyta	Tracheophyta	Spermatophyta	Magnoliophyta	Ceratophyllales	Ceratophyllaceae	Ceratophyllum
Chlamydomonas_reinhardtii	Eukaryota	Viridiplantae	Chlorophyta	Chlorophyceae	Chlamydomonadales	Chlamydomonadaceae	Chlamydomonas
Chloranthus_spicatus	Eukaryota	Viridiplantae	Streptophyta	Embryophyta	Tracheophyta	Spermatophyta	Magnoliophyta	basalMagnoliophyta	Chloranthales	Chloranthaceae	Chloranthus
Cicer_arietinum	Eukaryota	Viridiplantae	Streptophyta	Embryophyta	Tracheophyta	Spermatophyta	Magnoliophyta	eudicotyledons	coreeudicotyledons	rosids	fabids	Fabales	Fabaceae	Papilionoideae	Cicereae	Cicer
Citrus_sinensis	Eukaryota	Viridiplantae	Streptophyta	Embryophyta	Tracheophyta	Spermatophyta	Magnoliophyta	eudicotyledons	coreeudicotyledons	rosids	malvids	Sapindales	Rutaceae	Citrus
Coffea_arabica	Eukaryota	Viridiplantae	Streptophyta	Embryophyta	Tracheophyta	Spermatophyta	Magnoliophyta	eudicotyledons	coreeudicotyledons	asterids	lamiids	Gentianales	Rubiaceae	Ixoroideae	Coffeeae	Coffea
Coix_lacrymajobi	Eukaryota	Viridiplantae	Streptophyta	Embryophyta	Tracheophyta	Spermatophyta	Magnoliophyta	Liliopsida	Poales	Poaceae	PACMAD_clade	Panicoideae	Andropogoneae	Coix
Corynocarpus_laevigata	Eukaryota	Viridiplantae	Streptophyta	Embryophyta	Tracheophyta	Spermatophyta	Magnoliophyta	eudicotyledons	coreeudicotyledons	rosids	fabids	Cucurbitales	Corynocarpaceae	Corynocarpus
Crithmum_maritimum	Eukaryota	Viridiplantae	Streptophyta	Embryophyta	Tracheophyta	Spermatophyta	Magnoliophyta	eudicotyledons	coreeudicotyledons	asterids	campanulids	Apiales	Apiaceae	Apioideae	apioidsuperclade	Pyramidoptereae	Crithmum
Crucihimalaya_wallichii	Eukaryota	Viridiplantae	Streptophyta	Embryophyta	Tracheophyta	Spermatophyta	Magnoliophyta	eudicotyledons	coreeudicotyledons	rosids	malvids	Brassicales	Brassicaceae	Camelineae	Crucihimalaya
Cryptomeria_japonica	Eukaryota	Viridiplantae	Streptophyta	Embryophyta	Tracheophyta	Spermatophyta	Coniferopsida	Coniferales	Cupressaceae	Cryptomeria
Cucumis_melo	Eukaryota	Viridiplantae	Streptophyta	Embryophyta	Tracheophyta	Spermatophyta	Magnoliophyta	eudicotyledons	coreeudicotyledons	rosids	fabids	Cucurbitales	Cucurbitaceae	Benincaseae	Cucumis
Cucumis_sativus	Eukaryota	Viridiplantae	Streptophyta	Embryophyta	Tracheophyta	Spermatophyta	Magnoliophyta	eudicotyledons	coreeudicotyledons	rosids	fabids	Cucurbitales	Cucurbitaceae	Benincaseae	Cucumis
Cuscuta_exaltata	Eukaryota	Viridiplantae	Streptophyta	Embryophyta	Tracheophyta	Spermatophyta	Magnoliophyta	eudicotyledons	coreeudicotyledons	asterids	lamiids	Solanales	Convolvulaceae	Cuscuteae	Cuscuta
Cuscuta_gronovii	Eukaryota	Viridiplantae	Streptophyta	Embryophyta	Tracheophyta	Spermatophyta	Magnoliophyta	eudicotyledons	coreeudicotyledons	asterids	lamiids	Solanales	Convolvulaceae	Cuscuteae	Cuscuta
Cuscuta_obtusiflora	Eukaryota	Viridiplantae	Streptophyta	Embryophyta	Tracheophyta	Spermatophyta	Magnoliophyta	eudicotyledons	coreeudicotyledons	asterids	lamiids	Solanales	Convolvulaceae	Cuscuteae	Cuscuta
Cuscuta_reflexa	Eukaryota	Viridiplantae	Streptophyta	Embryophyta	Tracheophyta	Spermatophyta	Magnoliophyta	eudicotyledons	coreeudicotyledons	asterids	lamiids	Solanales	Convolvulaceae	Cuscuteae	Cuscuta
Cycas_taitungensis	Eukaryota	Viridiplantae	Streptophyta	Embryophyta	Tracheophyta	Spermatophyta	Cycadophyta	Cycadales	Cycadaceae	Cycas
Daucus_carota	Eukaryota	Viridiplantae	Streptophyta	Embryophyta	Tracheophyta	Spermatophyta	Magnoliophyta	eudicotyledons	coreeudicotyledons	asterids	campanulids	Apiales	Apiaceae	Apioideae	Scandiceae	Daucinae	Daucus
Dendrocalamus_latiflorus	Eukaryota	Viridiplantae	Streptophyta	Embryophyta	Tracheophyta	Spermatophyta	Magnoliophyta	Liliopsida	Poales	Poaceae	BEP_clade	Bambusoideae	Bambuseae	Dendrocalamus
Dioscorea_elephantipes	Eukaryota	Viridiplantae	Streptophyta	Embryophyta	Tracheophyta	Spermatophyta	Magnoliophyta	Liliopsida	Dioscoreales	Dioscoreaceae	Dioscorea
Draba_nemorosa	Eukaryota	Viridiplantae	Streptophyta	Embryophyta	Tracheophyta	Spermatophyta	Magnoliophyta	eudicotyledons	coreeudicotyledons	rosids	malvids	Brassicales	Brassicaceae	Arabideae	Draba
Drimys_granadensis	Eukaryota	Viridiplantae	Streptophyta	Embryophyta	Tracheophyta	Spermatophyta	Magnoliophyta	magnoliids	Canellales	Winteraceae	Drimys
Ephedra_equisetina	Eukaryota	Viridiplantae	Streptophyta	Embryophyta	Tracheophyta	Spermatophyta	Gnetophyta	Gnetopsida	Ephedrales	Ephedraceae	Ephedra
Epifagus_virginiana	Eukaryota	Viridiplantae	Streptophyta	Embryophyta	Tracheophyta	Spermatophyta	Magnoliophyta	eudicotyledons	coreeudicotyledons	asterids	lamiids	Lamiales	Orobanchaceae	Orobancheae	Epifagus
Equisetum_arvense	Eukaryota	Viridiplantae	Streptophyta	Embryophyta	Tracheophyta	Moniliformopses	Equisetopsida	Equisetales	Equisetaceae	Equisetum
Erodium_carvifolium	Eukaryota	Viridiplantae	Streptophyta	Embryophyta	Tracheophyta	Spermatophyta	Magnoliophyta	eudicotyledons	coreeudicotyledons	rosids	malvids	Geraniales	Geraniaceae	Erodium
Erodium_texanum	Eukaryota	Viridiplantae	Streptophyta	Embryophyta	Tracheophyta	Spermatophyta	Magnoliophyta	eudicotyledons	coreeudicotyledons	rosids	malvids	Geraniales	Geraniaceae	Erodium
Eucalyptus_globulus	Eukaryota	Viridiplantae	Streptophyta	Embryophyta	Tracheophyta	Spermatophyta	Magnoliophyta	eudicotyledons	coreeudicotyledons	rosids	malvids	Myrtales	Myrtaceae	Eucalyptus
Eucalyptus_grandis	Eukaryota	Viridiplantae	Streptophyta	Embryophyta	Tracheophyta	Spermatophyta	Magnoliophyta	eudicotyledons	coreeudicotyledons	rosids	malvids	Myrtales	Myrtaceae	Eucalyptus
Fagopyrum_esculentum	Eukaryota	Viridiplantae	Streptophyta	Embryophyta	Tracheophyta	Spermatophyta	Magnoliophyta	eudicotyledons	coreeudicotyledons	Caryophyllales	Polygonaceae	Fagopyrum
Ferrocalamus_rimosivaginus	Eukaryota	Viridiplantae	Streptophyta	Embryophyta	Tracheophyta	Spermatophyta	Magnoliophyta	Liliopsida	Poales	Poaceae	BEP_clade	Bambusoideae	Bambuseae	Ferrocalamus
Festuca_arundinacea	Eukaryota	Viridiplantae	Streptophyta	Embryophyta	Tracheophyta	Spermatophyta	Magnoliophyta	Liliopsida	Poales	Poaceae	BEP_clade	Pooideae	Poeae	Loliinae	Festuca
Fragaria_vesca	Eukaryota	Viridiplantae	Streptophyta	Embryophyta	Tracheophyta	Spermatophyta	Magnoliophyta	eudicotyledons	coreeudicotyledons	rosids	fabids	Rosales	Rosaceae	Rosoideae	Rosodae	Potentilleae	Fragaria
Geranium_palmatum	Eukaryota	Viridiplantae	Streptophyta	Embryophyta	Tracheophyta	Spermatophyta	Magnoliophyta	eudicotyledons	coreeudicotyledons	rosids	malvids	Geraniales	Geraniaceae	Geranium
Glycine_max	Eukaryota	Viridiplantae	Streptophyta	Embryophyta	Tracheophyta	Spermatophyta	Magnoliophyta	eudicotyledons	coreeudicotyledons	rosids	fabids	Fabales	Fabaceae	Papilionoideae	Phaseoleae	Glycine
Gnetum_parvifolium	Eukaryota	Viridiplantae	Streptophyta	Embryophyta	Tracheophyta	Spermatophyta	Gnetophyta	Gnetopsida	Gnetales	Gnetaceae	Gnetum
Gossypium_barbadense	Eukaryota	Viridiplantae	Streptophyta	Embryophyta	Tracheophyta	Spermatophyta	Magnoliophyta	eudicotyledons	coreeudicotyledons	rosids	malvids	Malvales	Malvaceae	Malvoideae	Gossypium
Gossypium_hirsutum	Eukaryota	Viridiplantae	Streptophyta	Embryophyta	Tracheophyta	Spermatophyta	Magnoliophyta	eudicotyledons	coreeudicotyledons	rosids	malvids	Malvales	Malvaceae	Malvoideae	Gossypium
Gossypium_thurberi	Eukaryota	Viridiplantae	Streptophyta	Embryophyta	Tracheophyta	Spermatophyta	Magnoliophyta	eudicotyledons	coreeudicotyledons	rosids	malvids	Malvales	Malvaceae	Malvoideae	Gossypium
Guizotia_abyssinica	Eukaryota	Viridiplantae	Streptophyta	Embryophyta	Tracheophyta	Spermatophyta	Magnoliophyta	eudicotyledons	coreeudicotyledons	asterids	campanulids	Asterales	Asteraceae	Asteroideae	Heliantheaealliance	Millerieae	Guizotia
Helianthus_annuus	Eukaryota	Viridiplantae	Streptophyta	Embryophyta	Tracheophyta	Spermatophyta	Magnoliophyta	eudicotyledons	coreeudicotyledons	asterids	campanulids	Asterales	Asteraceae	Asteroideae	Heliantheaealliance	Heliantheae	Helianthus
Hevea_brasiliensis	Eukaryota	Viridiplantae	Streptophyta	Embryophyta	Tracheophyta	Spermatophyta	Magnoliophyta	eudicotyledons	coreeudicotyledons	rosids	fabids	Malpighiales	Euphorbiaceae	Crotonoideae	Micrandreae	Hevea
Hordeum_vulgare	Eukaryota	Viridiplantae	Streptophyta	Embryophyta	Tracheophyta	Spermatophyta	Magnoliophyta	Liliopsida	Poales	Poaceae	BEP_clade	Pooideae	Triticeae	Hordeum
Huperzia_lucidula	Eukaryota	Viridiplantae	Streptophyta	Embryophyta	Tracheophyta	Lycopodiophyta	Lycopodiopsida	Lycopodiales	Lycopodiaceae	Huperzia
Illicium_oligandrum	Eukaryota	Viridiplantae	Streptophyta	Embryophyta	Tracheophyta	Spermatophyta	Magnoliophyta	basalMagnoliophyta	Austrobaileyales	Schisandraceae	Illicium
Indocalamus_longiauritus	Eukaryota	Viridiplantae	Streptophyta	Embryophyta	Tracheophyta	Spermatophyta	Magnoliophyta	Liliopsida	Poales	Poaceae	BEP_clade	Bambusoideae	Bambuseae	Indocalamus
Ipomoea_purpurea	Eukaryota	Viridiplantae	Streptophyta	Embryophyta	Tracheophyta	Spermatophyta	Magnoliophyta	eudicotyledons	coreeudicotyledons	asterids	lamiids	Solanales	Convolvulaceae	Ipomoeeae	Ipomoea
Isoetes_flaccida	Eukaryota	Viridiplantae	Streptophyta	Embryophyta	Tracheophyta	Lycopodiophyta	Isoetopsida	Isoetales	Isoetaceae	Isoetes
Jasminum_nudiflorum	Eukaryota	Viridiplantae	Streptophyta	Embryophyta	Tracheophyta	Spermatophyta	Magnoliophyta	eudicotyledons	coreeudicotyledons	asterids	lamiids	Lamiales	Oleaceae	Jasmineae	Jasminum
Jatropha_curcas	Eukaryota	Viridiplantae	Streptophyta	Embryophyta	Tracheophyta	Spermatophyta	Magnoliophyta	eudicotyledons	coreeudicotyledons	rosids	fabids	Malpighiales	Euphorbiaceae	Crotonoideae	Jatropheae	Jatropha
Keteleeria_davidiana	Eukaryota	Viridiplantae	Streptophyta	Embryophyta	Tracheophyta	Spermatophyta	Coniferopsida	Coniferales	Pinaceae	Keteleeria
Lactuca_sativa	Eukaryota	Viridiplantae	Streptophyta	Embryophyta	Tracheophyta	Spermatophyta	Magnoliophyta	eudicotyledons	coreeudicotyledons	asterids	campanulids	Asterales	Asteraceae	Cichorioideae	Cichorieae	Lactucinae	Lactuca
Lathyrus_sativus	Eukaryota	Viridiplantae	Streptophyta	Embryophyta	Tracheophyta	Spermatophyta	Magnoliophyta	eudicotyledons	coreeudicotyledons	rosids	fabids	Fabales	Fabaceae	Papilionoideae	Fabeae	Lathyrus
Lemna_minor	Eukaryota	Viridiplantae	Streptophyta	Embryophyta	Tracheophyta	Spermatophyta	Magnoliophyta	Liliopsida	Araceae	Lemnoideae	Lemna
Lepidium_virginicum	Eukaryota	Viridiplantae	Streptophyta	Embryophyta	Tracheophyta	Spermatophyta	Magnoliophyta	eudicotyledons	coreeudicotyledons	rosids	malvids	Brassicales	Brassicaceae	Lepidieae	Lepidium
Liriodendron_tulipifera	Eukaryota	Viridiplantae	Streptophyta	Embryophyta	Tracheophyta	Spermatophyta	Magnoliophyta	magnoliids	Magnoliales	Magnoliaceae	Liriodendron
Lobularia_maritima	Eukaryota	Viridiplantae	Streptophyta	Embryophyta	Tracheophyta	Spermatophyta	Magnoliophyta	eudicotyledons	coreeudicotyledons	rosids	malvids	Brassicales	Brassicaceae	Alysseae	Lobularia
Lolium_perenne	Eukaryota	Viridiplantae	Streptophyta	Embryophyta	Tracheophyta	Spermatophyta	Magnoliophyta	Liliopsida	Poales	Poaceae	BEP_clade	Pooideae	Poeae	Loliinae	Lolium
Lotus_japonicus	Eukaryota	Viridiplantae	Streptophyta	Embryophyta	Tracheophyta	Spermatophyta	Magnoliophyta	eudicotyledons	coreeudicotyledons	rosids	fabids	Fabales	Fabaceae	Papilionoideae	Loteae	Lotus
Magnolia_kwangsiensis	Eukaryota	Viridiplantae	Streptophyta	Embryophyta	Tracheophyta	Spermatophyta	Magnoliophyta	magnoliids	Magnoliales	Magnoliaceae	Magnolia
Manihot_esculenta	Eukaryota	Viridiplantae	Streptophyta	Embryophyta	Tracheophyta	Spermatophyta	Magnoliophyta	eudicotyledons	coreeudicotyledons	rosids	fabids	Malpighiales	Euphorbiaceae	Crotonoideae	Manihoteae	Manihot
Marchantia_polymorpha	Eukaryota	Viridiplantae	Streptophyta	Embryophyta	Marchantiophyta	Marchantiopsida	Marchantiidae	Marchantiales	Marchantiaceae	Marchantia
Medicago_truncatula	Eukaryota	Viridiplantae	Streptophyta	Embryophyta	Tracheophyta	Spermatophyta	Magnoliophyta	eudicotyledons	coreeudicotyledons	rosids	fabids	Fabales	Fabaceae	Papilionoideae	Trifolieae	Medicago
Megaleranthis_saniculifolia	Eukaryota	Viridiplantae	Streptophyta	Embryophyta	Tracheophyta	Spermatophyta	Magnoliophyta	eudicotyledons	Ranunculales	Ranunculaceae	Megaleranthis
Monsonia_speciosa	Eukaryota	Viridiplantae	Streptophyta	Embryophyta	Tracheophyta	Spermatophyta	Magnoliophyta	eudicotyledons	coreeudicotyledons	rosids	malvids	Geraniales	Geraniaceae	Monsonia
Morus_indica	Eukaryota	Viridiplantae	Streptophyta	Embryophyta	Tracheophyta	Spermatophyta	Magnoliophyta	eudicotyledons	coreeudicotyledons	rosids	fabids	Rosales	Moraceae	Morus
Nandina_domestica	Eukaryota	Viridiplantae	Streptophyta	Embryophyta	Tracheophyta	Spermatophyta	Magnoliophyta	eudicotyledons	Ranunculales	Berberidaceae	Nandina
Nasturtium_officinale	Eukaryota	Viridiplantae	Streptophyta	Embryophyta	Tracheophyta	Spermatophyta	Magnoliophyta	eudicotyledons	coreeudicotyledons	rosids	malvids	Brassicales	Brassicaceae	Cardamineae	Nasturtium
Nelumbo_lutea	Eukaryota	Viridiplantae	Streptophyta	Embryophyta	Tracheophyta	Spermatophyta	Magnoliophyta	eudicotyledons	Proteales	Nelumbonaceae	Nelumbo
Nelumbo_nucifera	Eukaryota	Viridiplantae	Streptophyta	Embryophyta	Tracheophyta	Spermatophyta	Magnoliophyta	eudicotyledons	Proteales	Nelumbonaceae	Nelumbo
Nicotiana_sylvestris	Eukaryota	Viridiplantae	Streptophyta	Embryophyta	Tracheophyta	Spermatophyta	Magnoliophyta	eudicotyledons	coreeudicotyledons	asterids	lamiids	Solanales	Solanaceae	Nicotianoideae	Nicotianeae	Nicotiana
Nicotiana_tabacum	Eukaryota	Viridiplantae	Streptophyta	Embryophyta	Tracheophyta	Spermatophyta	Magnoliophyta	eudicotyledons	coreeudicotyledons	asterids	lamiids	Solanales	Solanaceae	Nicotianoideae	Nicotianeae	Nicotiana
Nicotiana_tomentosiformis	Eukaryota	Viridiplantae	Streptophyta	Embryophyta	Tracheophyta	Spermatophyta	Magnoliophyta	eudicotyledons	coreeudicotyledons	asterids	lamiids	Solanales	Solanaceae	Nicotianoideae	Nicotianeae	Nicotiana
Nuphar_advena	Eukaryota	Viridiplantae	Streptophyta	Embryophyta	Tracheophyta	Spermatophyta	Magnoliophyta	basalMagnoliophyta	Nymphaeales	Nymphaeaceae	Nuphar
Nymphaea_alba	Eukaryota	Viridiplantae	Streptophyta	Embryophyta	Tracheophyta	Spermatophyta	Magnoliophyta	basalMagnoliophyta	Nymphaeales	Nymphaeaceae	Nymphaea
Oenothera_argillicola	Eukaryota	Viridiplantae	Streptophyta	Embryophyta	Tracheophyta	Spermatophyta	Magnoliophyta	eudicotyledons	coreeudicotyledons	rosids	malvids	Myrtales	Onagraceae	Oenothera
Oenothera_biennis	Eukaryota	Viridiplantae	Streptophyta	Embryophyta	Tracheophyta	Spermatophyta	Magnoliophyta	eudicotyledons	coreeudicotyledons	rosids	malvids	Myrtales	Onagraceae	Oenothera
Oenothera_elata	Eukaryota	Viridiplantae	Streptophyta	Embryophyta	Tracheophyta	Spermatophyta	Magnoliophyta	eudicotyledons	coreeudicotyledons	rosids	malvids	Myrtales	Onagraceae	Oenothera
Oenothera_glazioviana	Eukaryota	Viridiplantae	Streptophyta	Embryophyta	Tracheophyta	Spermatophyta	Magnoliophyta	eudicotyledons	coreeudicotyledons	rosids	malvids	Myrtales	Onagraceae	Oenothera
Oenothera_parviflora	Eukaryota	Viridiplantae	Streptophyta	Embryophyta	Tracheophyta	Spermatophyta	Magnoliophyta	eudicotyledons	coreeudicotyledons	rosids	malvids	Myrtales	Onagraceae	Oenothera
Olea_europaea	Eukaryota	Viridiplantae	Streptophyta	Embryophyta	Tracheophyta	Spermatophyta	Magnoliophyta	eudicotyledons	coreeudicotyledons	asterids	lamiids	Lamiales	Oleaceae	Oleeae	Olea
Olea_woodiana	Eukaryota	Viridiplantae	Streptophyta	Embryophyta	Tracheophyta	Spermatophyta	Magnoliophyta	eudicotyledons	coreeudicotyledons	asterids	lamiids	Lamiales	Oleaceae	Oleeae	Olea
Oncidium_Gower	Eukaryota	Viridiplantae	Streptophyta	Embryophyta	Tracheophyta	Spermatophyta	Magnoliophyta	Liliopsida	Asparagales	Orchidaceae	Epidendroideae	Maxillarieae	Oncidiinae	Oncidium
Oryza_Indica	Eukaryota	Viridiplantae	Streptophyta	Embryophyta	Tracheophyta	Spermatophyta	Magnoliophyta	Liliopsida	Poales	Poaceae	BEP_clade	Ehrhartoideae	Oryzeae	Oryza
Oryza_Japonica	Eukaryota	Viridiplantae	Streptophyta	Embryophyta	Tracheophyta	Spermatophyta	Magnoliophyta	Liliopsida	Poales	Poaceae	BEP_clade	Ehrhartoideae	Oryzeae	Oryza
Oryza_nivara	Eukaryota	Viridiplantae	Streptophyta	Embryophyta	Tracheophyta	Spermatophyta	Magnoliophyta	Liliopsida	Poales	Poaceae	BEP_clade	Ehrhartoideae	Oryzeae	Oryza
Oxypolis_greenmanii	Eukaryota	Viridiplantae	Streptophyta	Embryophyta	Tracheophyta	Spermatophyta	Magnoliophyta	eudicotyledons	coreeudicotyledons	asterids	campanulids	Apiales	Apiaceae	Apioideae	Oenantheae	Oxypolis
Panax_ginseng	Eukaryota	Viridiplantae	Streptophyta	Embryophyta	Tracheophyta	Spermatophyta	Magnoliophyta	eudicotyledons	coreeudicotyledons	asterids	campanulids	Apiales	Araliaceae	Panax
Panicum_virgatum	Eukaryota	Viridiplantae	Streptophyta	Embryophyta	Tracheophyta	Spermatophyta	Magnoliophyta	Liliopsida	Poales	Poaceae	PACMAD_clade	Panicoideae	Paniceae	Panicum
Parthenium_argentatum	Eukaryota	Viridiplantae	Streptophyta	Embryophyta	Tracheophyta	Spermatophyta	Magnoliophyta	eudicotyledons	coreeudicotyledons	asterids	campanulids	Asterales	Asteraceae	Asteroideae	Heliantheaealliance	Heliantheae	Parthenium
Pelargonium_x	Eukaryota	Viridiplantae	Streptophyta	Embryophyta	Tracheophyta	Spermatophyta	Magnoliophyta	eudicotyledons	coreeudicotyledons	rosids	malvids	Geraniales	Geraniaceae	Pelargonium
Petroselinum_crispum	Eukaryota	Viridiplantae	Streptophyta	Embryophyta	Tracheophyta	Spermatophyta	Magnoliophyta	eudicotyledons	coreeudicotyledons	asterids	campanulids	Apiales	Apiaceae	Apioideae	apioid	superclade	Apieae	Petroselinum
Phalaenopsis_aphrodite	Eukaryota	Viridiplantae	Streptophyta	Embryophyta	Tracheophyta	Spermatophyta	Magnoliophyta	Liliopsida	Asparagales	Orchidaceae	Epidendroideae	Vandeae	Aeridinae	Phalaenopsis
Phaseolus_vulgaris	Eukaryota	Viridiplantae	Streptophyta	Embryophyta	Tracheophyta	Spermatophyta	Magnoliophyta	eudicotyledons	coreeudicotyledons	rosids	fabids	Fabales	Fabaceae	Papilionoideae	Phaseoleae	Phaseolus
Phoenix_dactylifera	Eukaryota	Viridiplantae	Streptophyta	Embryophyta	Tracheophyta	Spermatophyta	Magnoliophyta	Liliopsida	Arecaceae	Coryphoideae	Phoeniceae	Phoenix
Phyllostachys_edulis	Eukaryota	Viridiplantae	Streptophyta	Embryophyta	Tracheophyta	Spermatophyta	Magnoliophyta	Liliopsida	Poales	Poaceae	BEP_clade	Bambusoideae	Bambuseae	Phyllostachys
Phyllostachys_nigra	Eukaryota	Viridiplantae	Streptophyta	Embryophyta	Tracheophyta	Spermatophyta	Magnoliophyta	Liliopsida	Poales	Poaceae	BEP_clade	Bambusoideae	Bambuseae	Phyllostachys
Physcomitrella_patens	Eukaryota	Viridiplantae	Streptophyta	Embryophyta	Bryophyta	Bryophytina	Bryopsida	Funariidae	Funariales	Funariaceae	Physcomitrella
Picea_morrisonicola	Eukaryota	Viridiplantae	Streptophyta	Embryophyta	Tracheophyta	Spermatophyta	Coniferopsida	Coniferales	Pinaceae	Picea
Picea_sitchensis	Eukaryota	Viridiplantae	Streptophyta	Embryophyta	Tracheophyta	Spermatophyta	Coniferopsida	Coniferales	Pinaceae	Picea
Pinus_contorta	Eukaryota	Viridiplantae	Streptophyta	Embryophyta	Tracheophyta	Spermatophyta	Coniferopsida	Coniferales	Pinaceae	Pinus
Pinus_gerardiana	Eukaryota	Viridiplantae	Streptophyta	Embryophyta	Tracheophyta	Spermatophyta	Coniferopsida	Coniferales	Pinaceae	Pinus
Pinus_koraiensis	Eukaryota	Viridiplantae	Streptophyta	Embryophyta	Tracheophyta	Spermatophyta	Coniferopsida	Coniferales	Pinaceae	Pinus
Pinus_krempfii	Eukaryota	Viridiplantae	Streptophyta	Embryophyta	Tracheophyta	Spermatophyta	Coniferopsida	Coniferales	Pinaceae	Pinus
Pinus_longaeva	Eukaryota	Viridiplantae	Streptophyta	Embryophyta	Tracheophyta	Spermatophyta	Coniferopsida	Coniferales	Pinaceae	Pinus
Pinus_monophylla	Eukaryota	Viridiplantae	Streptophyta	Embryophyta	Tracheophyta	Spermatophyta	Coniferopsida	Coniferales	Pinaceae	Pinus
Pinus_nelsonii	Eukaryota	Viridiplantae	Streptophyta	Embryophyta	Tracheophyta	Spermatophyta	Coniferopsida	Coniferales	Pinaceae	Pinus	Pinus2
Pinus_thunbergii	Eukaryota	Viridiplantae	Streptophyta	Embryophyta	Tracheophyta	Spermatophyta	Coniferopsida	Coniferales	Pinaceae	Pinus	Pinus2
Piper_cenocladum	Eukaryota	Viridiplantae	Streptophyta	Embryophyta	Tracheophyta	Spermatophyta	Magnoliophyta	magnoliids	Piperales	Piperaceae	Piper
Pisum_sativum	Eukaryota	Viridiplantae	Streptophyta	Embryophyta	Tracheophyta	Spermatophyta	Magnoliophyta	eudicotyledons	coreeudicotyledons	rosids	fabids	Fabales	Fabaceae	Papilionoideae	Fabeae	Pisum
Platanus_occidentalis	Eukaryota	Viridiplantae	Streptophyta	Embryophyta	Tracheophyta	Spermatophyta	Magnoliophyta	eudicotyledons	Proteales	Platanaceae	Platanus
Populus_alba	Eukaryota	Viridiplantae	Streptophyta	Embryophyta	Tracheophyta	Spermatophyta	Magnoliophyta	eudicotyledons	coreeudicotyledons	rosids	fabids	Malpighiales	Salicaceae	Saliceae	Populus
Populus_trichocarpa	Eukaryota	Viridiplantae	Streptophyta	Embryophyta	Tracheophyta	Spermatophyta	Magnoliophyta	eudicotyledons	coreeudicotyledons	rosids	fabids	Malpighiales	Salicaceae	Saliceae	Populus
Prunus_persica	Eukaryota	Viridiplantae	Streptophyta	Embryophyta	Tracheophyta	Spermatophyta	Magnoliophyta	eudicotyledons	coreeudicotyledons	rosids	fabids	Rosales	Rosaceae	Maloideae	Amygdaleae	Prunus
Pseudotsuga_sinensis	Eukaryota	Viridiplantae	Streptophyta	Embryophyta	Tracheophyta	Spermatophyta	Coniferopsida	Coniferales	Pinaceae	Pseudotsuga
Psilotum_nudum	Eukaryota	Viridiplantae	Streptophyta	Embryophyta	Tracheophyta	Moniliformopses	Psilotales	Psilotaceae	Psilotum
Pteridium_aquilinum	Eukaryota	Viridiplantae	Streptophyta	Embryophyta	Tracheophyta	Moniliformopses	Polypodiopsida	Polypodiales	Dennstaedtiaceae	Pteridium
Ptilidium_pulcherrimum	Eukaryota	Viridiplantae	Streptophyta	Embryophyta	Marchantiophyta	Jungermanniopsida	Jungermanniidae	Ptilidiales	Ptilidiaceae	Ptilidium
Pyrus_pyrifolia	Eukaryota	Viridiplantae	Streptophyta	Embryophyta	Tracheophyta	Spermatophyta	Magnoliophyta	eudicotyledons	coreeudicotyledons	rosids	fabids	Rosales	Rosaceae	Maloideae	Maleae	Pyrus
Ranunculus_macranthus	Eukaryota	Viridiplantae	Streptophyta	Embryophyta	Tracheophyta	Spermatophyta	Magnoliophyta	eudicotyledons	Ranunculales	Ranunculaceae	Ranunculus
Rhizanthella_gardneri	Eukaryota	Viridiplantae	Streptophyta	Embryophyta	Tracheophyta	Spermatophyta	Magnoliophyta	Liliopsida	Asparagales	Orchidaceae	Orchidoideae	Diurideae	Rhizanthellinae	Rhizanthella
Saccharum_officinarum	Eukaryota	Viridiplantae	Streptophyta	Embryophyta	Tracheophyta	Spermatophyta	Magnoliophyta	Liliopsida	Poales	Poaceae	PACMAD_clade	Panicoideae	Andropogoneae	Saccharum
Selaginella_moellendorffii	Eukaryota	Viridiplantae	Streptophyta	Embryophyta	Tracheophyta	Lycopodiophyta	Isoetopsida	Selaginellales	Selaginellaceae	Selaginella
Solanum_bulbocastanum	Eukaryota	Viridiplantae	Streptophyta	Embryophyta	Tracheophyta	Spermatophyta	Magnoliophyta	eudicotyledons	coreeudicotyledons	asterids	lamiids	Solanales	Solanaceae	Solanoideae	Solaneae	Solanum
Solanum_lycopersicum	Eukaryota	Viridiplantae	Streptophyta	Embryophyta	Tracheophyta	Spermatophyta	Magnoliophyta	eudicotyledons	coreeudicotyledons	asterids	lamiids	Solanales	Solanaceae	Solanoideae	Solaneae	Solanum
Solanum_tuberosum	Eukaryota	Viridiplantae	Streptophyta	Embryophyta	Tracheophyta	Spermatophyta	Magnoliophyta	eudicotyledons	coreeudicotyledons	asterids	lamiids	Solanales	Solanaceae	Solanoideae	Solaneae	Solanum
Sorghum_bicolor	Eukaryota	Viridiplantae	Streptophyta	Embryophyta	Tracheophyta	Spermatophyta	Magnoliophyta	Liliopsida	Poales	Poaceae	PACMAD_clade	Panicoideae	Andropogoneae	Sorghum
Spinacia_oleracea	Eukaryota	Viridiplantae	Streptophyta	Embryophyta	Tracheophyta	Spermatophyta	Magnoliophyta	eudicotyledons	coreeudicotyledons	Caryophyllales	Amaranthaceae	Spinacia
Spirodela_polyrhiza	Eukaryota	Viridiplantae	Streptophyta	Embryophyta	Tracheophyta	Spermatophyta	Magnoliophyta	Liliopsida	Araceae	Lemnoideae	Spirodela
Syntrichia_ruralis	Eukaryota	Viridiplantae	Streptophyta	Embryophyta	Bryophyta	Bryophytina	Bryopsida	Dicranidae	Pottiales	Pottiaceae	Syntrichia
Taiwania_cryptomerioides	Eukaryota	Viridiplantae	Streptophyta	Embryophyta	Tracheophyta	Spermatophyta	Coniferopsida	Coniferales	Cupressaceae	Taiwania
Theobroma_cacao	Eukaryota	Viridiplantae	Streptophyta	Embryophyta	Tracheophyta	Spermatophyta	Magnoliophyta	eudicotyledons	coreeudicotyledons	rosids	malvids	Malvales	Malvaceae	Byttnerioideae	Theobroma
Trachelium_caeruleum	Eukaryota	Viridiplantae	Streptophyta	Embryophyta	Tracheophyta	Spermatophyta	Magnoliophyta	eudicotyledons	coreeudicotyledons	asterids	campanulids	Asterales	Campanulaceae	Trachelium
Trifolium_subterraneum	Eukaryota	Viridiplantae	Streptophyta	Embryophyta	Tracheophyta	Spermatophyta	Magnoliophyta	eudicotyledons	coreeudicotyledons	rosids	fabids	Fabales	Fabaceae	Papilionoideae	Trifolieae	Trifolium
Triticum_aestivum	Eukaryota	Viridiplantae	Streptophyta	Embryophyta	Tracheophyta	Spermatophyta	Magnoliophyta	Liliopsida	Poales	Poaceae	BEP_clade	Pooideae	Triticeae	Triticum
Typha_latifolia	Eukaryota	Viridiplantae	Streptophyta	Embryophyta	Tracheophyta	Spermatophyta	Magnoliophyta	Liliopsida	Poales	Typhaceae	Typha
Vigna_radiata	Eukaryota	Viridiplantae	Streptophyta	Embryophyta	Tracheophyta	Spermatophyta	Magnoliophyta	eudicotyledons	coreeudicotyledons	rosids	fabids	Fabales	Fabaceae	Papilionoideae	Phaseoleae	Vigna
Vitis_vinifera	Eukaryota	Viridiplantae	Streptophyta	Embryophyta	Tracheophyta	Spermatophyta	Magnoliophyta	eudicotyledons	coreeudicotyledons	rosids	Vitales	Vitaceae	Vitis
Welwitschia_mirabilis	Eukaryota	Viridiplantae	Streptophyta	Embryophyta	Tracheophyta	Spermatophyta	Gnetophyta	Gnetopsida	Welwitschiales	Welwitschiaceae	Welwitschia
Wolffia_australiana	Eukaryota	Viridiplantae	Streptophyta	Embryophyta	Tracheophyta	Spermatophyta	Magnoliophyta	Liliopsida	Araceae	Lemnoideae	Wolffia
Wolffiella_lingulata	Eukaryota	Viridiplantae	Streptophyta	Embryophyta	Tracheophyta	Spermatophyta	Magnoliophyta	Liliopsida	Araceae	Lemnoideae	Wolffiella
Zea_mays	Eukaryota	Viridiplantae	Streptophyta	Embryophyta	Tracheophyta	Spermatophyta	Magnoliophyta	Liliopsida	Poales	Poaceae	PACMAD_clade	Panicoideae	Andropogoneae	Zea
